# Supplementary material for: Phorbolester-activated Munc13-1 and ubMunc13-2 exert opposing effects on dense-core vesicle secretion
Source: eLife. 2022 Oct 10;11:e79433. doi: 10.7554/eLife.79433 (PMC9581527; doi:10.7554/eLife.79433)
Supplement: Figure 1—source data 1. [file elife-79433-fig1-data1.xlsx]

## Sheet: Figure 1
Fig. 1A-F	B. RRP				E. SRP				D. Sustained				C. Tau fast				F. Tau slow
N (prep) = 3	Mean (fF)	SEM (fF)	Median (fF)	n (cells)	Mean (fF)	SEM (fF)	Median (fF)	n (cells)	Mean (fF)	SEM (fF)	Median (fF)	n (cells)	Mean (ms)	SEM (ms)	Median (fF)	n (cells)	Mean (s)	SEM (s)	Median (fF)	n (cells)
Munc13-2 WT	88.15	19.48	69.41	24	48.11	7.78	45.86	24	123.63	19.83	118.5	24	23	2.73	20.82	23	0.32	0.06	0.20	18
Munc13-2 WT + PMA	232.27	35.87	168.5	20	110.45	15.86	92.9	20	187.46	31.26	135.5	20	30.34	2.61	26.91	20	0.26	0.04	0.22	20
Mann-Whitney test	***	P=0.0001			***	P=0.0009			ns	P=0.1641			*	P=0.0265			ns	P=0.7837
Fig. 1G-L	I. RRP				K. SRP				J. Sustained				I. Tau fast				L. Tau slow
N (prep) = 3	Mean (fF)	SEM (fF)	Median (fF)	n (cells)	Mean (fF)	SEM (fF)	Median (fF)	n (cells)	Mean (fF)	SEM (fF)	Median (fF)	n (cells)	Mean (ms)	SEM (ms)	Median (fF)	n (cells)	Mean (s)	Median (fF)	SEM (s)	n (cells)
Munc13-2 KO	47.87	14.37	20.22	21	56.04	10.49	37.24	21	26.19	6.97	28	21	22.12	2.49	22.39	16	0.36	0.05	0.35	19
Munc13-2 KO + PMA	13.63	5.06	6.09	19	16.49	3.67	11.77	19	14.4	4.36	13.4	19	17.98	4.16	10.85	14	0.36	0.05	0.30	16
Mann-Whitney test	*	P=0.0405			**	P=0.0016			*	P=0.0496			ns	P=0.1794			ns	P=0.987
Fig. 1M-O				N. CgA integrated density (normalized to Munc13-2 WT)
N (prep) = 3				Mean	SEM (s)	Median	n (cells)
Munc13-2 KO				0.894645	0.16243	0.58	30
Munc13-2 KO + PMA				0.848219	0.0593014	0.87	32
Munc13-2 WT				1	0.0883519	0.93	29
Munc13-2 WT + PMA				0.746808	0.088992	0.46	28
				Summary	P-value
Munc13-2 KO vs. Munc13-2 KO + PMA				ns	>0.9999		Kruskal-Wallis - Dunn's multiple comparisons test
Munc13-2 KO vs. Munc13-2 WT				ns	0.3689		Kruskal-Wallis - Dunn's multiple comparisons test
Munc13-2 KO vs. Munc13-2WT + PMA				ns	>0.9999		Kruskal-Wallis - Dunn's multiple comparisons test
Munc13-2 KO + PMA vs. Munc13-2 WT				ns	>0.9999		Kruskal-Wallis - Dunn's multiple comparisons test
Munc13-2 KO + PMA vs. Munc13-2 WT + PMA				ns	>0.9999		Kruskal-Wallis - Dunn's multiple comparisons test
Munc13-2 WT vs. Munc13-2 WT + PMA				ns	0.1084		Kruskal-Wallis - Dunn's multiple comparisons test
O. Normalized PM fluorescence intensity Total / Inside (normalized to Munc13-2 WT)
				Mean	SEM (s)	Median	n (cells)
Munc13-2 KO				0.926205	0.0785693	0.81	30
Munc13-2 KO + PMA				0.843792	0.058247	0.73	32
Munc13-2 WT				1	0.0779417	0.9	29
Munc13-2 WT + PMA				0.905981	0.0683081	0.9	28
				Summary	P-value
Munc13-2 KO vs. Munc13-2 KO + PMA				ns	>0.9999		Kruskal-Wallis - Dunn's multiple comparisons test
Munc13-2 KO vs. Munc13-2 WT				ns	>0.9999		Kruskal-Wallis - Dunn's multiple comparisons test
Munc13-2 KO vs. Munc13-2WT + PMA				ns	>0.9999		Kruskal-Wallis - Dunn's multiple comparisons test
Munc13-2 KO + PMA vs. Munc13-2 WT				ns	0.8141		Kruskal-Wallis - Dunn's multiple comparisons test
Munc13-2 KO + PMA vs. Munc13-2 WT + PMA				ns	>0.9999		Kruskal-Wallis - Dunn's multiple comparisons test
Munc13-2 WT vs. Munc13-2 WT + PMA				ns	>0.9999		Kruskal-Wallis - Dunn's multiple comparisons test
