# Supplementary material for: Phorbolester-activated Munc13-1 and ubMunc13-2 exert opposing effects on dense-core vesicle secretion
Source: eLife. 2022 Oct 10;11:e79433. doi: 10.7554/eLife.79433 (PMC9581527; doi:10.7554/eLife.79433)
Supplement: Figure 2—source data 1. [file elife-79433-fig2-data1.xlsx]

## Sheet: Figure 2
Fig. 2	B. RRP				E. SRP				D. Sustained				C. Tau fast				F. Tau slow
N (prep) = 4	Mean (fF)	SEM (fF)	Median (fF)	n (cells)	Mean (fF)	SEM (fF)	Median (fF)	n (cells)	Mean (fF)	SEM (fF)	Median (fF)	n (cells)	Mean (ms)	SEM (ms)	Median (fF)	n (cells)	Mean (s)	SEM (s)	Median (fF)	n (cells)
Munc13-1 KO	44.41	7.69	35.95	24	40.49	9.45	22.45	24	195.15	26.51	180.50	24	12.57	1.07	13.2	23	0.34	0.06	0.29	16
Munc13-1 KO + PMA	169.16	37.89	140	21	95.57	14.21	83.90	21	187.25	36.83	157	21	13.65	1.60	13.04	20	0.39	0.06	0.28	21
Munc13-1 WT	36.89	6.99	29.40	23	29.85	7.88	16.40	23	180.79	20.18	166	23	17.81	3.12	18.04	20	0.32	0.08	0.17	12
Munc13-1 WT + PMA	88.47	11.90	74.10	26	45.43	7.01	38.65	26	181.5	22.95	142	26	13.65	1.78	11.95	26	0.26	0.04	0.15	22
Fig. 2				B. RRP		E. SRP		D. Sustained		C. Tau fast		F. Tau slow
Kruskal-Wallis - Dunn's multiple comparisons test				Summary	P Value	Summary	P Value	Summary	P Value	Summary	P Value	Summary	P Value
Munc13-1 WT vs. Munc13-1 WT PMA				**	0.0091	ns	0.8045	ns	>0.9999	ns	>0.9999	ns	>0.9999
Munc13-1 WT vs. Munc13-1 KO				ns	>0.9999	ns	>0.9999	ns	>0.9999	ns	>0.9999	ns	>0.9999
Munc13-1 WT vs. Munc13-1 KO PMA				**	0.0036	***	0.0003	ns	>0.9999	ns	>0.9999	ns	>0.9999
Munc13-1 WT PMA vs. Munc13-1 KO				ns	0.0688	ns	>0.9999	ns	>0.9999	ns	>0.9999	ns	>0.9999
Munc13-1 WT PMA vs. Munc13-1 KO PMA				ns	>0.9999	*	0.0437	ns	>0.9999	ns	>0.9999	ns	0.4412
Munc13-1 KO vs. Munc13-1 KO PMA				*	0.0288	**	0.0048	ns	>0.9999	ns	>0.9999	ns	>0.9999
2-way ANOVA of RRP
Source of Variation	% of total variation	P value	P value summary
Interaction	3.147	0.0562	ns
PMA	18.29	<0.0001	****
Genotype	4.57	0.022	*
2-way ANOVA of SRP
Source of Variation	% of total variation	P value	P value summary
Interaction	3.609	0.0442	*
PMA	11.55	0.0004	***
Genotype	8.57	0.0023	**
