# Supplementary material for: Phorbolester-activated Munc13-1 and ubMunc13-2 exert opposing effects on dense-core vesicle secretion
Source: eLife. 2022 Oct 10;11:e79433. doi: 10.7554/eLife.79433 (PMC9581527; doi:10.7554/eLife.79433)
Supplement: Figure 3—figure supplement 3—source data 2. [file elife-79433-fig3-figsupp3-data2.xlsx]

## Sheet: Figure 3 - Figure Supp 3
Fig. 3 - Supp 3B	Total EGFP Fluorescence intensity (a.u.)
	Mean	SEM	Median	n (cells)
OE Munc13-1 KO N (prep) = 4	2600345	621201	1450000	21
OE Munc13-2 KO N (prep) = 5	1162263	113588	1110000	24
Mann-Whitney test	*	P=0.0212
