# Supplementary material for: Phorbolester-activated Munc13-1 and ubMunc13-2 exert opposing effects on dense-core vesicle secretion
Source: eLife. 2022 Oct 10;11:e79433. doi: 10.7554/eLife.79433 (PMC9581527; doi:10.7554/eLife.79433)
Supplement: Figure 3—source data 1. [file elife-79433-fig3-data1.xlsx]

## Sheet: Figure 3
Fig. 3	C. PM recruitment				D. Delta Cm - Burst				D. Delta Cm - Total				D. Delta Cm - Sust.
N (prep) = 5	Mean (fF)	SEM (fF)	Median (fF)	n (cells)	Mean (fF)	SEM (fF)	Median (fF)	n (cells)	Mean (fF)	SEM (fF)	Median (fF)	n (cells)	Mean (ms)	SEM (ms)	Median (fF)	n (cells)
OE Munc13-2 KO	0.03835	0.006357	0.03	25	239.09	25.96	233	25	808.93	107.82	667.68	25	570.22	87.67	402	25
OE Munc13-2 KO + PMA	0.003766	0.002202	0.0019	30	628.72	119.64	347	30	1344.53	178.7	1060	30	714.66	89.75	617	30
Mann-Whitney test	****	P<0.0001			*	P=0.0314			*	P=0.0479			ns	P=0.2992
