# Supplementary material for: Phorbolester-activated Munc13-1 and ubMunc13-2 exert opposing effects on dense-core vesicle secretion
Source: eLife. 2022 Oct 10;11:e79433. doi: 10.7554/eLife.79433 (PMC9581527; doi:10.7554/eLife.79433)
Supplement: Figure 4—figure supplement 1—source data 1. [file elife-79433-fig4-figsupp1-data1.xlsx]

## Sheet: Figure 4 - Figure Supp 1
Fig. 4 - Supp 1 C-D	C. PM recruitment				D. Delta Cm - Burst				D. Delta Cm - Total				D. Delta Cm - Sust.
N (prep) = 2	Mean (fF)	SEM (fF)	Median (fF)	n (cells)	Mean (fF)	SEM (fF)	Median (fF)	n (cells)	Mean (fF)	SEM (fF)	Median (fF)	n (cells)	Mean (ms)	SEM (ms)	Median (fF)	n (cells)
WT cells					108.01	22.13	76.55	18	300.79	48.49	221	18	192.78	32.25	141	18
WT oe Munc13-1	0.00078338	0.00102764	0.0005	17	172.46	32.06	141	17	686.58	16.85	533	17	514.11	15.36	325	17
Mann Whittney					ns	P=0.0942			*	P=0.0105			*	P=0.0126
Fig. 4 - Supp-1 E-I	E. RRP				H. SRP				G. Sustained				F. Tau fast				I. Tau slow
N (prep) = 2	Mean (fF)	SEM (fF)	Median (fF)	n (cells)	Mean (fF)	SEM (fF)	Median (fF)	n (cells)	Mean (fF)	SEM (fF)	Median (fF)	n (cells)	Mean (ms)	SEM (ms)	Median (fF)	n (cells)	Mean (ms)	SEM (ms)	Median (fF)	n (cells)
WT cells	19.1	7.01	10.7	18	104.16	33.36	43.65	18	177.53	32.64	129.5	18	16.46	4.31	11.11	13	0.42	0.07	0.34	14
WT oe Munc13-1	43.78	17.96	6.41	17	71.82	33.84	0	17	570.97	170.58	334	17	13.51	3.99	8.05	11	0.55	0.12	0.68	6
Mann-Whitney test	ns	P=0.9144			ns	P=0.0957			**	P=0.0037			ns	P=0.6085			ns	P=0.3530
