# Supplementary material for: Phorbolester-activated Munc13-1 and ubMunc13-2 exert opposing effects on dense-core vesicle secretion
Source: eLife. 2022 Oct 10;11:e79433. doi: 10.7554/eLife.79433 (PMC9581527; doi:10.7554/eLife.79433)
Supplement: Figure 4—figure supplement 3—source data 1. [file elife-79433-fig4-figsupp3-data1.xlsx]

## Sheet: Figure 4 - Figure Supp 3
Fig. 4 - Figure Supp 3	C. PM recruitment				D. Delta Cm - Burst				D. Delta Cm - Total				D. Delta Cm - Sust.
N (prep) = 1	Mean (fF)	SEM (fF)	Median (fF)	n (cells)	Mean (fF)	SEM (fF)	Median (fF)	n (cells)	Mean (fF)	SEM (fF)	Median (fF)	n (cells)	Mean (ms)	SEM (ms)	Median (fF)	n (cells)
OE Munc13-1 H567K	0.007947	0.002453	0.005	15	331.38	41.6	319	15	432.56	72.95	379	15	101.19	36.04	60	15
OE Munc13-1 H567K + PMA	0.004897	0.004897	0.004	15	364.49	62.55	284	15	432.85	82.79	329	15	68.35	24.55	31.5	15
Mann-Whitney test	ns	P=0.6673			ns	P=0.9349			ns	P=0.8146			ns	P=0.5668
