# Supplementary material for: Phorbolester-activated Munc13-1 and ubMunc13-2 exert opposing effects on dense-core vesicle secretion
Source: eLife. 2022 Oct 10;11:e79433. doi: 10.7554/eLife.79433 (PMC9581527; doi:10.7554/eLife.79433)
Supplement: Figure 4—source data 1. [file elife-79433-fig4-data1.xlsx]

## Sheet: Figure 4
Fig. 4	C. PM recruitment				D. Delta Cm - Burst				D. Delta Cm - Total				D. Delta Cm - Sust.
N (prep) = 4	Mean (fF)	SEM (fF)	Median (fF)	n (cells)	Mean (fF)	SEM (fF)	Median (fF)	n (cells)	Mean (fF)	SEM (fF)	Median (fF)	n (cells)	Mean (ms)	SEM (ms)	Median (fF)	n (cells)
OE Munc13-1 KO	0.009308	0.002813	0.006	21	136.92	26.09	109	21	414.22	69.47	358	21	273.3	52.74	220	21
OE Munc13-1 KO + PMA	-3.8883e-05	0.004485	0.002	21	68.34	9.1	57.1	21	219.27	34.35	182	21	150.93	32.07	116	21
Mann-Whitney test	ns	P=0.0521			*	P=0.0117			*	P=0.0182			ns	P=0.0793
