# Supplementary material for: Phorbolester-activated Munc13-1 and ubMunc13-2 exert opposing effects on dense-core vesicle secretion
Source: eLife. 2022 Oct 10;11:e79433. doi: 10.7554/eLife.79433 (PMC9581527; doi:10.7554/eLife.79433)
Supplement: Figure 5—source data 1. [file elife-79433-fig5-data1.xlsx]

## Sheet: Figure 5
Fig.5	C. PM recruitment				D. Delta Cm - Burst				D. Delta Cm - Total				D. Delta Cm - Sust.
N (prep) = 3	Mean (fF)	SEM (fF)	Median (fF)	n (cells)	Mean (fF)	SEM (fF)	Median (fF)	n (cells)	Mean (fF)	SEM (fF)	Median (fF)	n (cells)	Mean (ms)	SEM (ms)	Median (fF)	n (cells)
OE Munc13-1 KO	0.00804552	0.00180817	0.008	18	104.64	20.58	98.35	18	452.45	62.21	407	18	347.81	63.42	260.5	18
OE Munc13-1 KO + PMA	0.006684	0.00147128	0.007	19	104.47	18.3	92.7	19	210.43	50.4	187	19	105.96	38.75	74.3	19
Mann-Whitney test	ns	P=0.2983			ns	P=0.8280			****	P<0.0001			***	P=0.0001
