# Supplementary material for: Phorbolester-activated Munc13-1 and ubMunc13-2 exert opposing effects on dense-core vesicle secretion
Source: eLife. 2022 Oct 10;11:e79433. doi: 10.7554/eLife.79433 (PMC9581527; doi:10.7554/eLife.79433)
Supplement: Figure 6—source data 1. [file elife-79433-fig6-data1.xlsx]

## Sheet: Figure 6
Fig. 6	C. PM recruitment				D. Delta Cm - Burst				D. Delta Cm - Total				D. Delta Cm - Sust.
N (prep) = 4	Mean (fF)	SEM (fF)	Median (fF)	n (cells)	Mean (fF)	SEM (fF)	Median (fF)	n (cells)	Mean (fF)	SEM (fF)	Median (fF)	n (cells)	Mean (ms)	SEM (ms)	Median (fF)	n (cells)
Syt-7 WT oe Munc13-2	0.02847	0.004104	0.025	21	317.01	53.24	337	21	1240.1	154.53	1280	21	923.19	120.41	876	21
Syt-7 KO oe Munc13-2	0.02891	0.005198	0.029	22	150.21	24.91	127.5	22	1052.45	127.58	797	22	901.95	113.73	682	22
Mann-Whitney test	ns	P=0.7821			*	P=0.0286			ns	P=0.4774			ns	P=0.9904
