# Supplementary material for: Phorbolester-activated Munc13-1 and ubMunc13-2 exert opposing effects on dense-core vesicle secretion
Source: eLife. 2022 Oct 10;11:e79433. doi: 10.7554/eLife.79433 (PMC9581527; doi:10.7554/eLife.79433)
Supplement: Figure 7—figure supplement 1—source data 1. [file elife-79433-fig7-figsupp1-data1.xlsx]

## Sheet: Figure 7- Figure Supp 1
Fig. 7 - Supp 1	C. PM recruitment				D. Delta Cm - Burst				D. Delta Cm - Total				D. Delta Cm - Sust.
N (prep) = 3	Mean (fF)	SEM (fF)	Median (fF)	n (cells)	Mean (fF)	SEM (fF)	Median (fF)	n (cells)	Mean (fF)	SEM (fF)	Median (fF)	n (cells)	Mean (ms)	SEM (ms)	Median (fF)	n (cells)
Syt-7 KO					47.61	8.46	36.95	16	158.11	15.92	141.5	16	110.5	15	91.85	16
Syt-7 KO oe Munc13-1	0.00996591	0.00200729	0.011	14	44.04	12.86	47.3	14	373.74	85.94	248.5	14	329.7	80.43	253.5	14
Syt-7 KO oe Munc13-1 PMA	0.00643576	0.00112916	0.004	19	54.45	16.34	25.8	19	165.84	41.31	114	19	111.38	33.4	27	19
Mann Whittney	ns	P=0.0653
				D. Delta Cm - Burst		D. Delta Cm - Total		D. Delta Cm - Sust.
Kruskal-Wallis - Dunn's multiple comparisons test				Summary	P Value	Summary	P Value	Summary	P Value
Syt-7 KO vs. KO OE Munc13-1				ns	>0.9999	ns	0.1793	ns	0.0978
Syt-7 KO vs. KO OE Munc13-1 PMA				ns	0.8676	ns	>0.9999	ns	>0.9999
KO OE Munc13-1 vs. KO OE Munc13-1 PMA				ns	>0.9999	*	0.0426	*	0.0146
