# Supplementary material for: Phorbolester-activated Munc13-1 and ubMunc13-2 exert opposing effects on dense-core vesicle secretion
Source: eLife. 2022 Oct 10;11:e79433. doi: 10.7554/eLife.79433 (PMC9581527; doi:10.7554/eLife.79433)
Supplement: Figure 7—figure supplement 2—source data 1. [file elife-79433-fig7-figsupp2-data1.xlsx]

## Sheet: Figure 7 - Figure Supp 2
Fig. 7 - Figure Supp 2	B. RRP				E. SRP				D. Sustained				C. Tau fast				F. Tau slow
N (prep) = 4	Mean (fF)	SEM (fF)	Median (fF)	n (cells)	Mean (fF)	SEM (fF)	Median (fF)	n (cells)	Mean (fF)	SEM (fF)	Median (fF)	n (cells)	Mean (ms)	SEM (ms)	Median (fF)	n (cells)	Mean (s)	SEM (s)	Median (fF)	n (cells)
Munc13-2 WT	73.78	11.06	58.05	27	62.24	10.54	72.23	27	187.88	28.20	151	27	14.44	1.42	12.77	27	0.49	0.05	0.51	18
Munc13-2 WT + Gö6983	55.83	11.20	42	25	50.44	12.95	0	25	208.28	31.17	213	25	15.35	2.40	10.74	22	0.50	0.04	0.53	12
Munc13-2 KO	7.35	2.24	0	18	57.43	8.28	56.64	18	16.88	9.70	7.96	18	16.98	4.85	11.98	8	0.62	0.07	0.65	17
Munc13-2 KO + Gö6983	17.87	6.98	0	19	51.29	9.28	50.25	19	22.73	1.18	7.72	19	11.4	2.38	11.75	9	0.56	0.05	0.54	14
			B. RRP		E. SRP		D. Sustained		C. Tau fast		F. Tau slow
Mann Whittney test			Summary	P Value	Summary	P Value	Summary	P Value	Summary	P Value	Summary	P Value
Munc13-2 WT vs Munc13-2 WT Gö6983			ns	0.1034	ns	0.2819	ns	0.4698	ns	0.7727	ns	0.6615
Munc13-2 KO vs Munc13-2 KO Gö6983			ns	0.5590	ns	0.7124	ns	0.7359	ns	0.6058	ns	0.4213
