# Supplementary material for: Phorbolester-activated Munc13-1 and ubMunc13-2 exert opposing effects on dense-core vesicle secretion
Source: eLife. 2022 Oct 10;11:e79433. doi: 10.7554/eLife.79433 (PMC9581527; doi:10.7554/eLife.79433)
Supplement: Figure 7—source data 1. [file elife-79433-fig7-data1.xlsx]

## Sheet: Figure 7
Fig. 7	C. PM recruitment				D. Delta Cm - Burst				D. Delta Cm - Total				D. Delta Cm - Sust.
N (prep) = 2	Mean (fF)	SEM (fF)	Median (fF)	n (cells)	Mean (fF)	SEM (fF)	Median (fF)	n (cells)	Mean (fF)	SEM (fF)	Median (fF)	n (cells)	Mean (ms)	SEM (ms)	Median (fF)	n (cells)
Syt-7 KO oe Munc13-2	0.02578	0.004654	0.025	14	220.51	51.6	217	14	896.6	199.86	699.5	14	676.336	156.89	494.5	14
Syt-7 KO oe Munc13-2 PMA	0.001899	0.001283	0.001	17	185.45	53.19	99.1	17	223.03	53.6	127	17	37.43	15.5259	27.4	17
Mann-Whitney test	****	P<0.0001			ns	P=0.3989			***	P=0.0002			****	P<0.0001
