# Supplementary figures and images for: Phorbolester-activated Munc13-1 and ubMunc13-2 exert opposing effects on dense-core vesicle secretion
Source: eLife journal article supplement (doi:10.7554/elife.79433), 2022-10-07

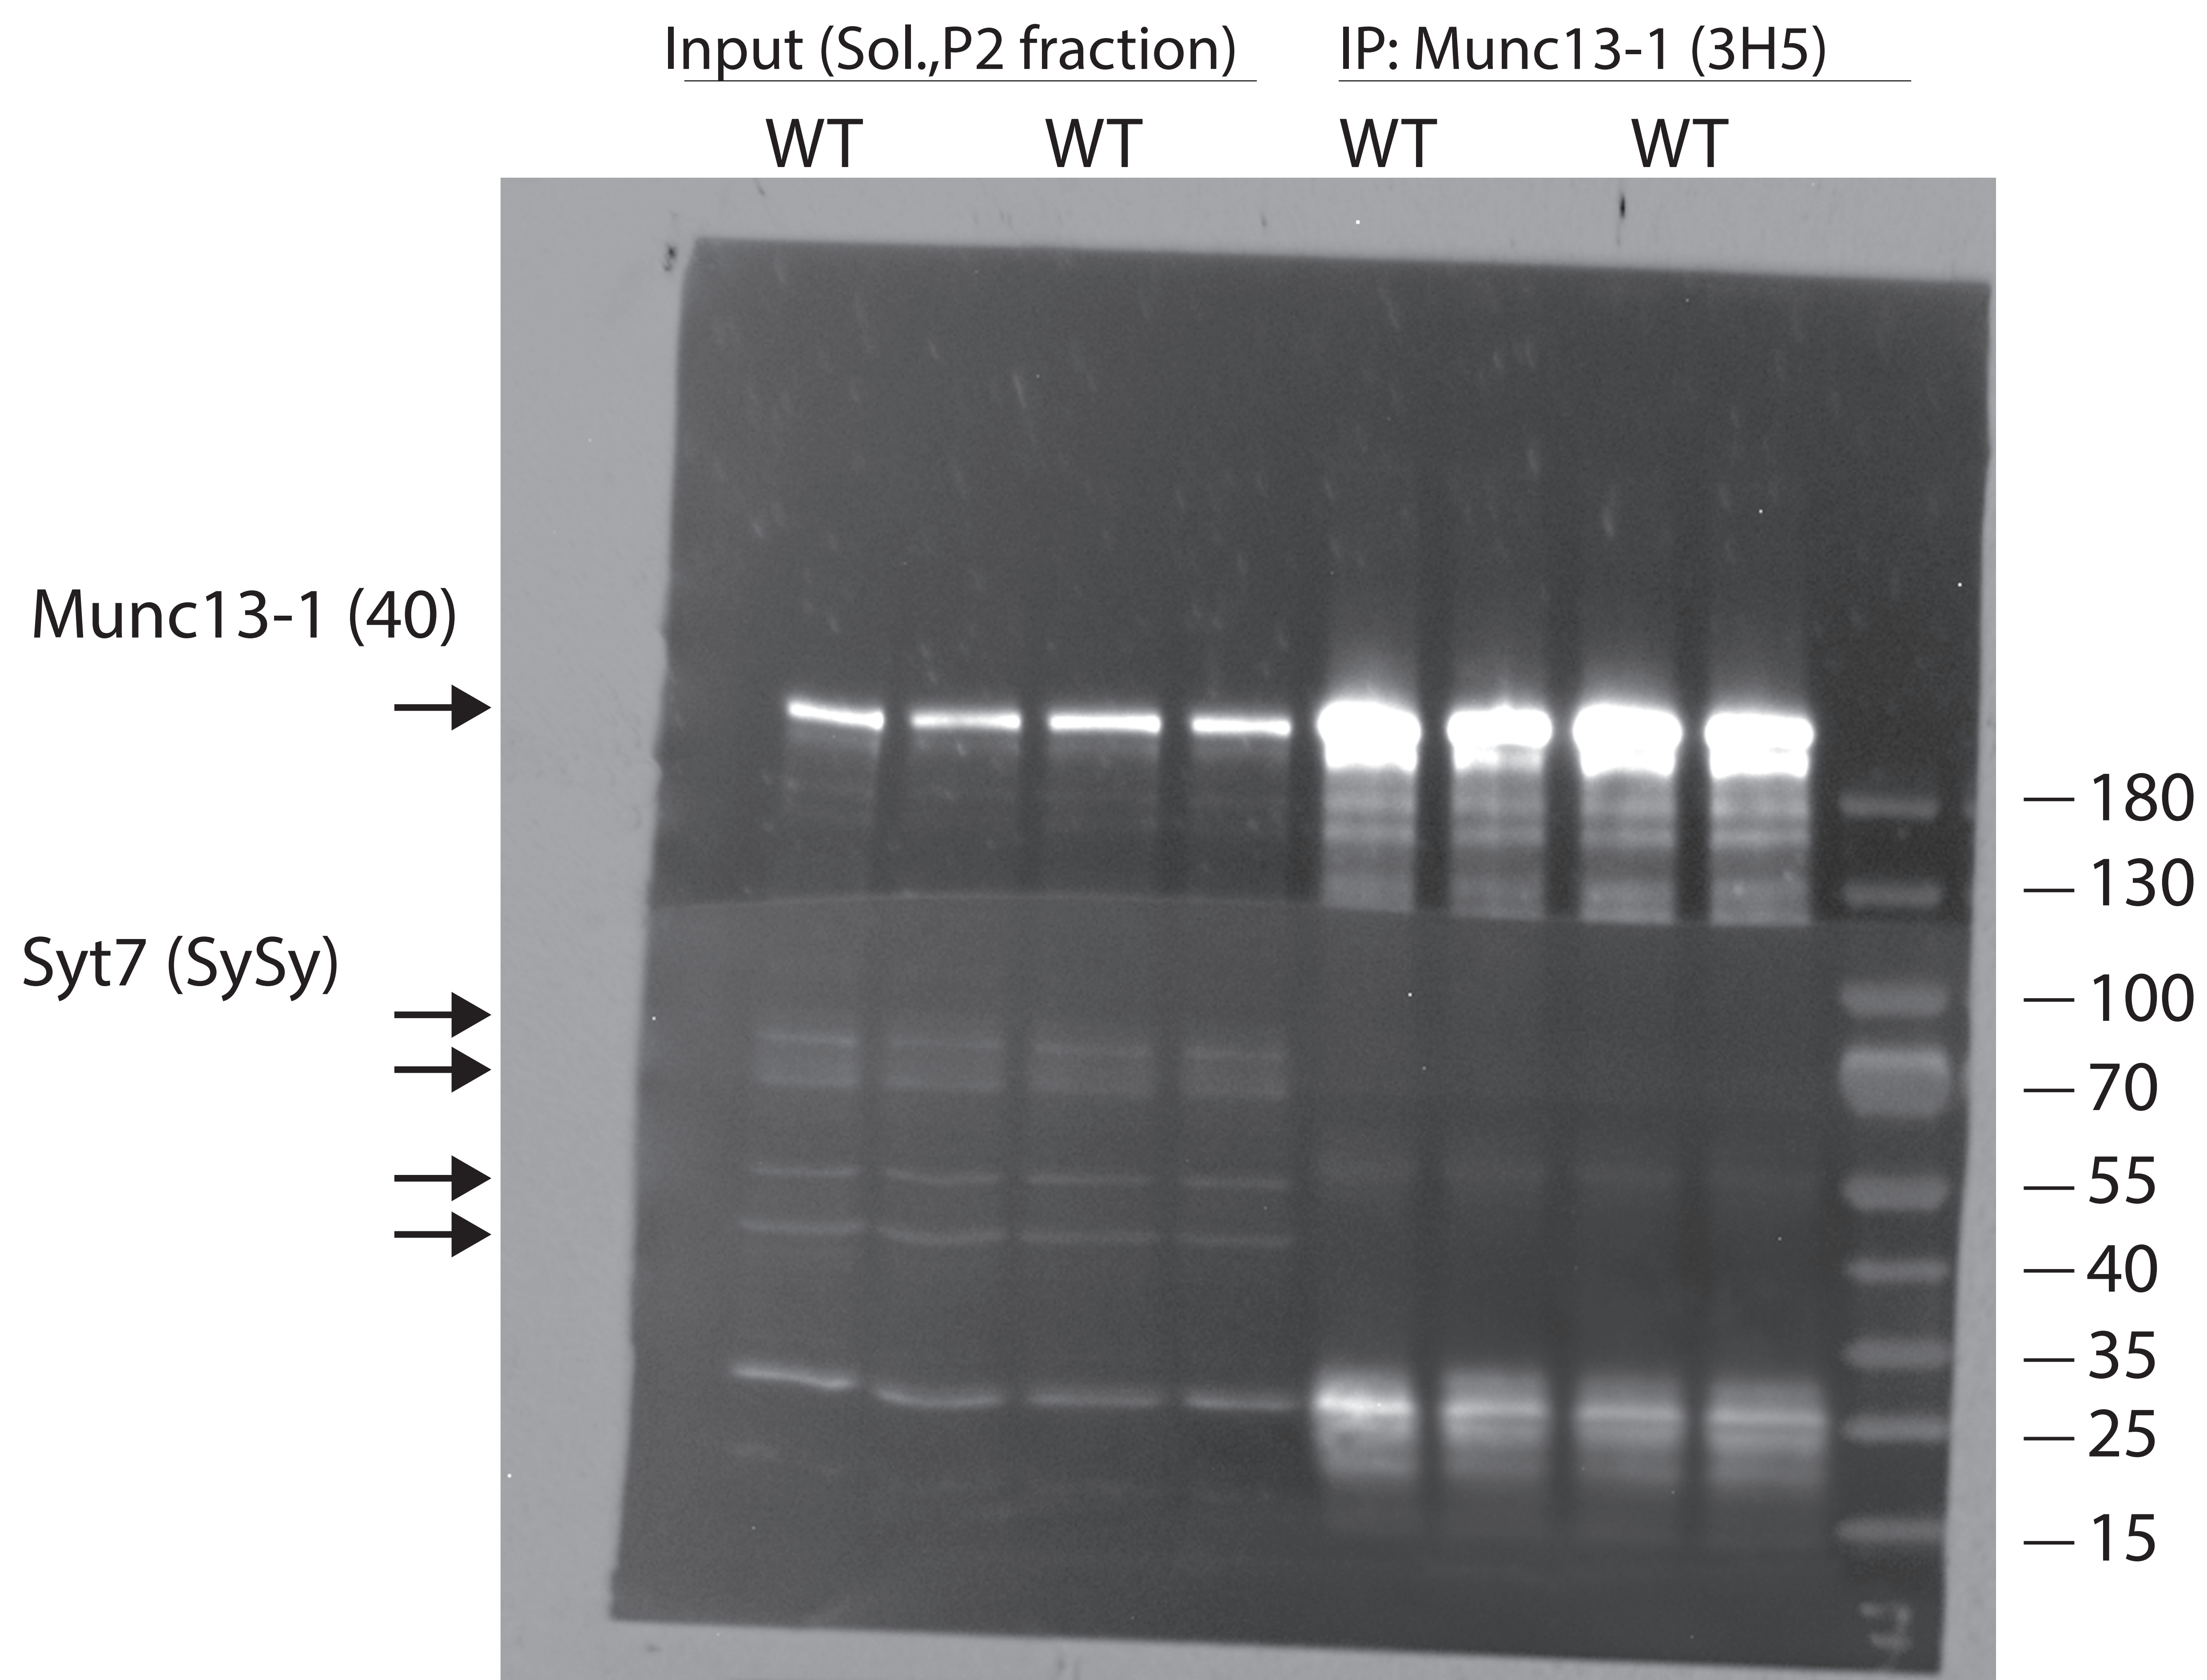

Supplement: fig6-figsupp1-data1 [file elife-79433-fig6-figsupp1-data1-v2.zip]

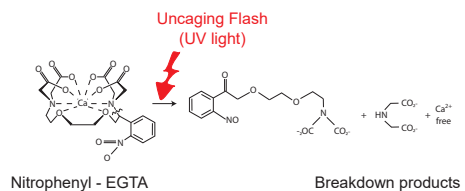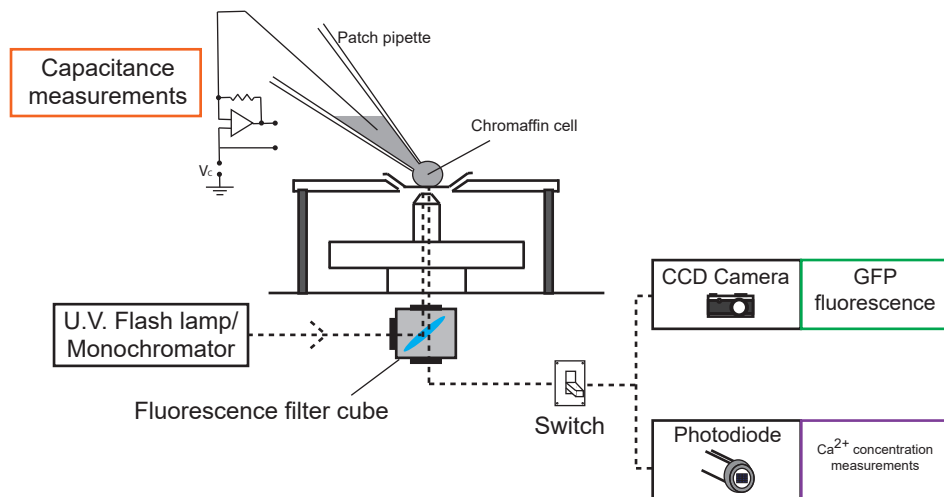

Supplement: supp [file elife_poa_e79433_Figure_3_figure_supplement_1.pdf › elife_poa_e79433_Figure_3_figure_supplement_1.pdf]

**A**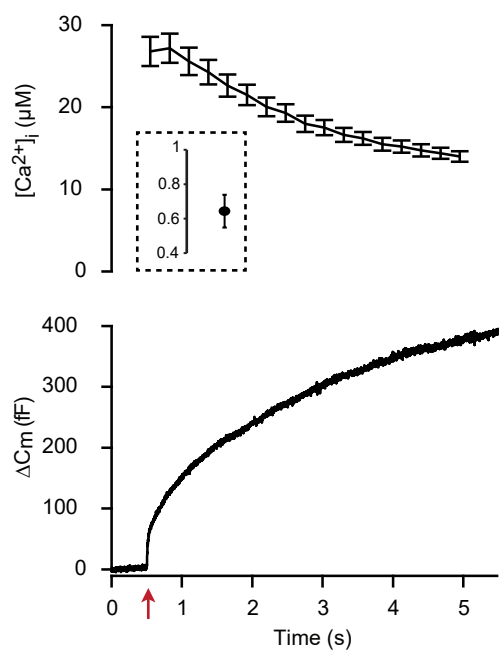

Supplement: supp [file elife_poa_e79433_Figure_3_figure_supplement_2.pdf › elife_poa_e79433_Figure_3_figure_supplement_2.pdf]

**A**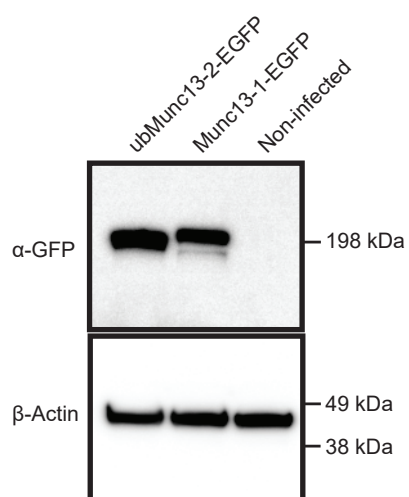**B**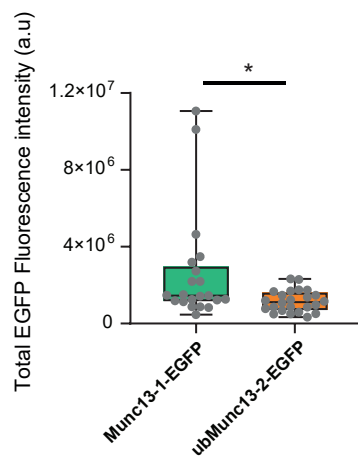

Supplement: supp [file elife_poa_e79433_Figure_3_figure_supplement_3.pdf › elife_poa_e79433_Figure_3_figure_supplement_3.pdf]

**A**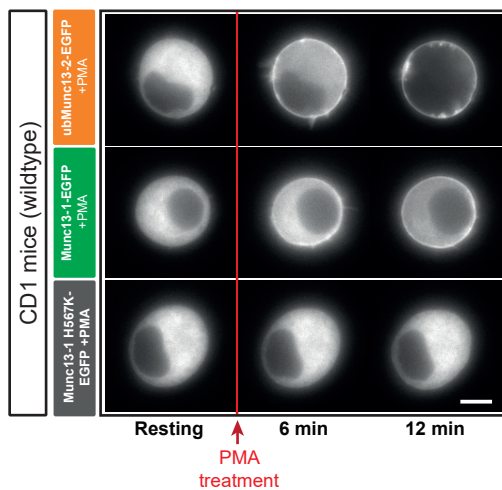**B**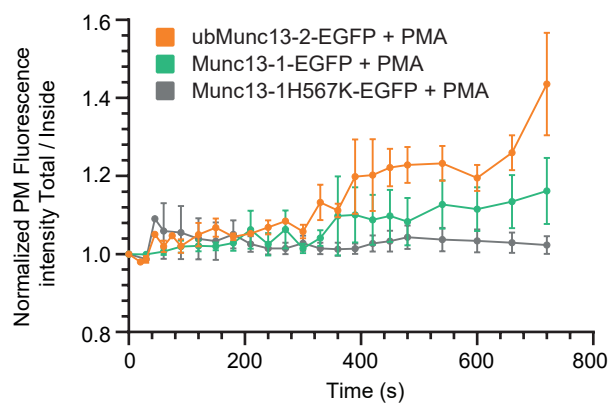

Supplement: supp [file elife_poa_e79433_Figure_3_figure_supplement_4.pdf › elife_poa_e79433_Figure_3_figure_supplement_4.pdf]

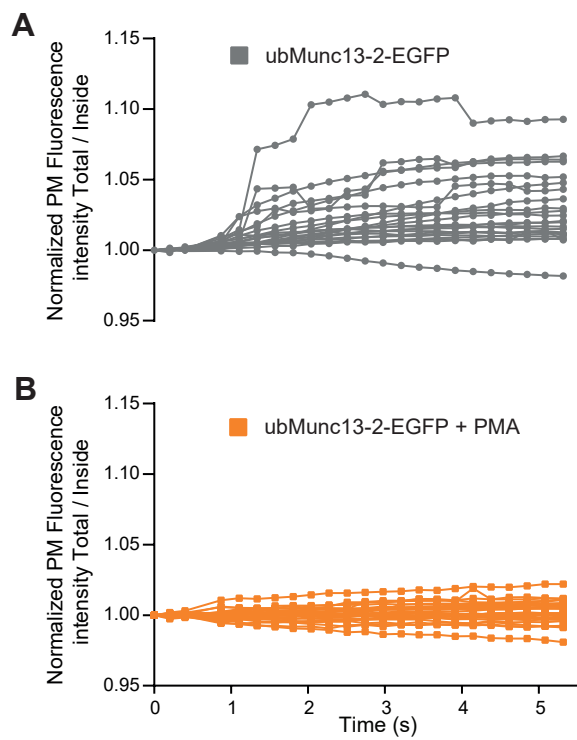

Supplement: supp [file elife_poa_e79433_Figure_3_figure_supplement_5.pdf › elife_poa_e79433_Figure_3_figure_supplement_5.pdf]

**A**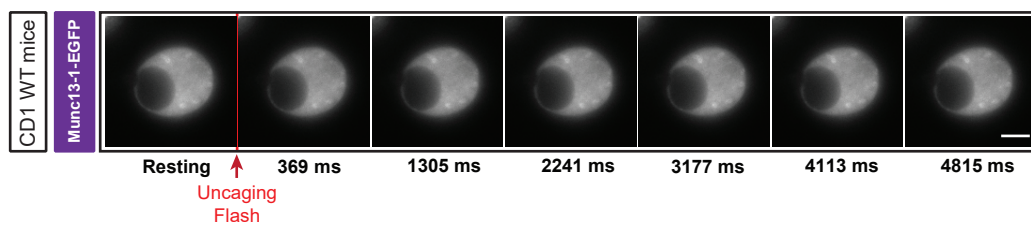**B**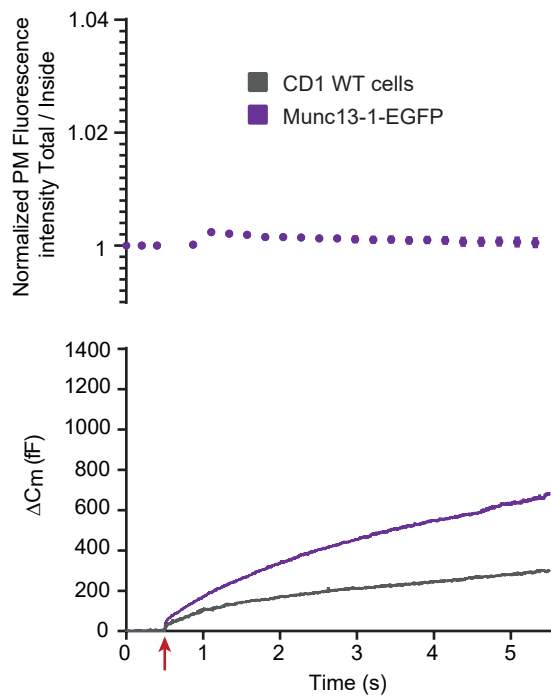**C**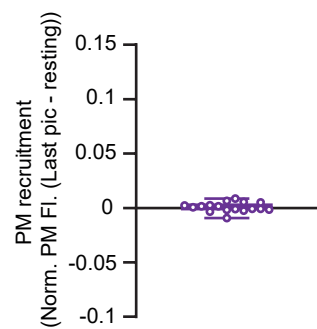**D**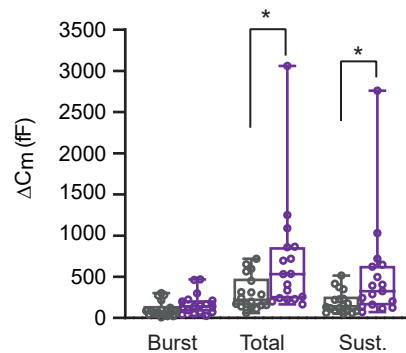**E**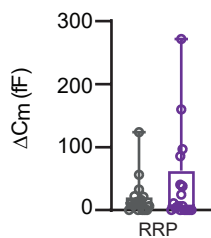**F**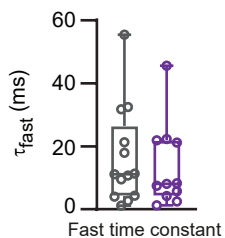**G**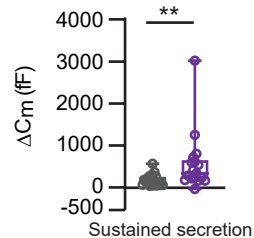**H**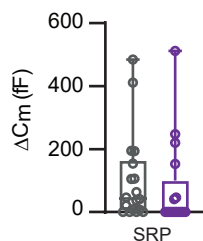**I**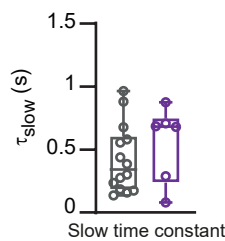

CD1 WT cells  
Munc13-1-EGFP

Supplement: supp [file elife_poa_e79433_Figure_4_figure_supplement_1.pdf › elife_poa_e79433_Figure_4_figure_supplement_1.pdf]

**A**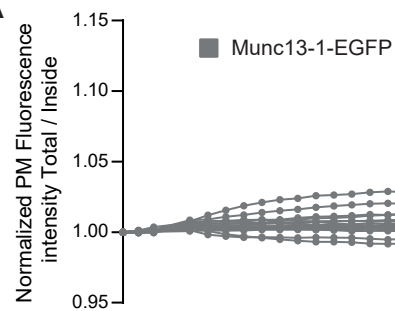**B**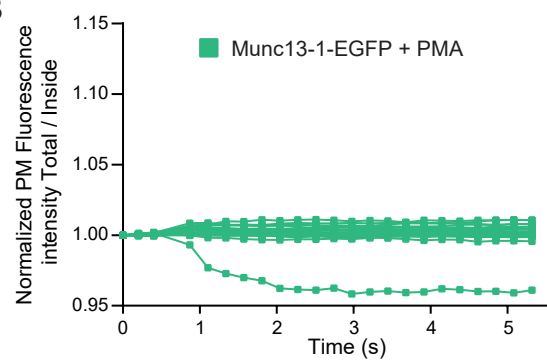

Supplement: supp [file elife_poa_e79433_Figure_4_figure_supplement_2.pdf › elife_poa_e79433_Figure_4_figure_supplement_2.pdf]

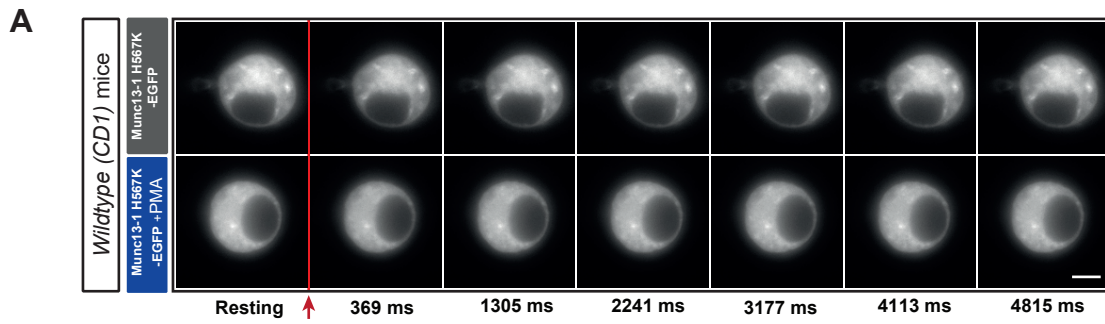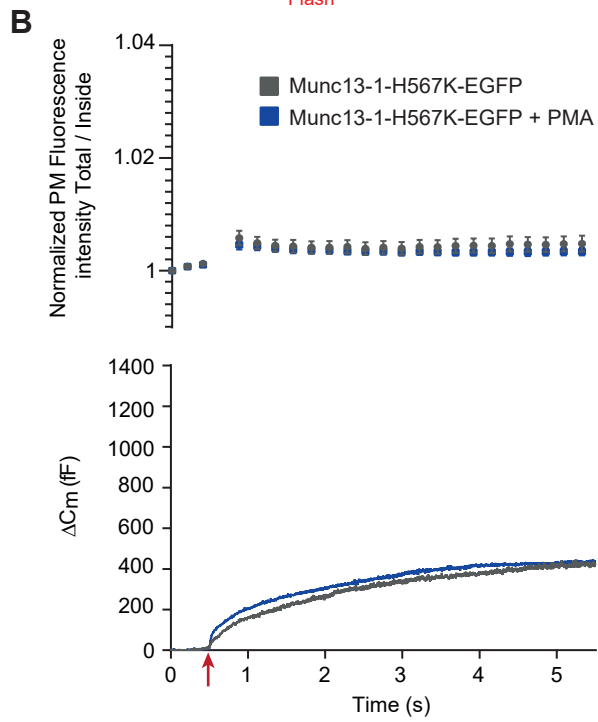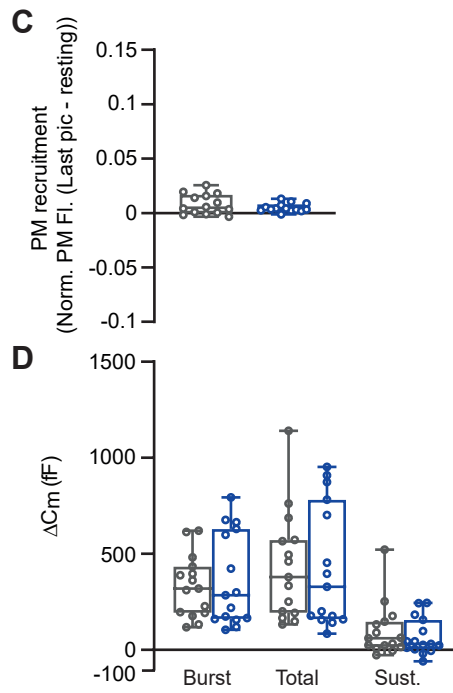

Supplement: supp [file elife_poa_e79433_Figure_4_figure_supplement_3.pdf › elife_poa_e79433_Figure_4_figure_supplement_3.pdf]

**A**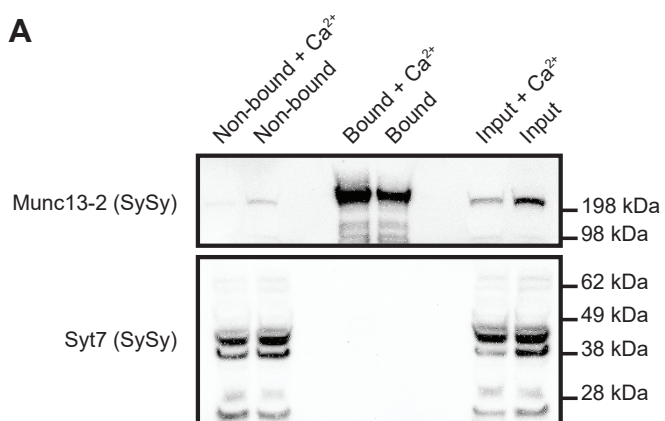**B**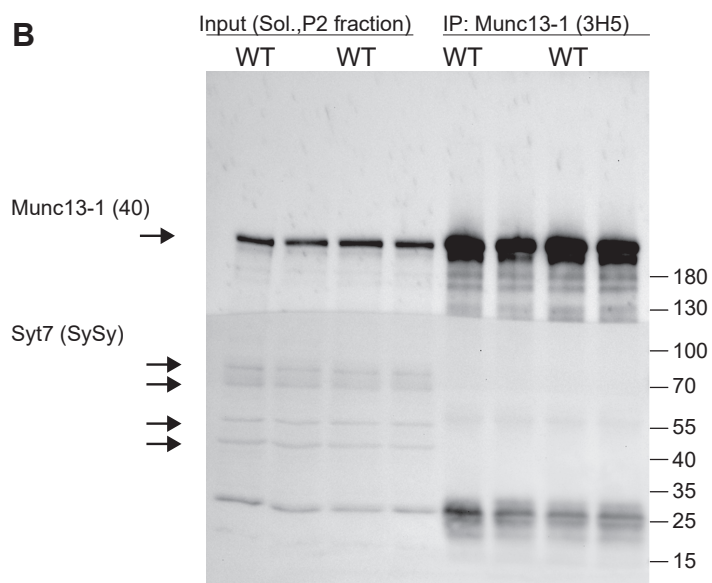

Supplement: supp [file elife_poa_e79433_Figure_6_figure_supplement_1.pdf › elife_poa_e79433_Figure_6_figure_supplement_1.pdf]

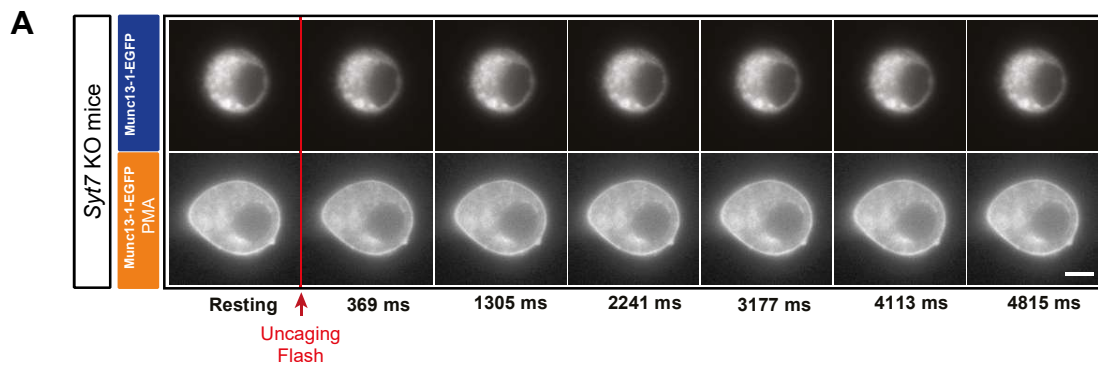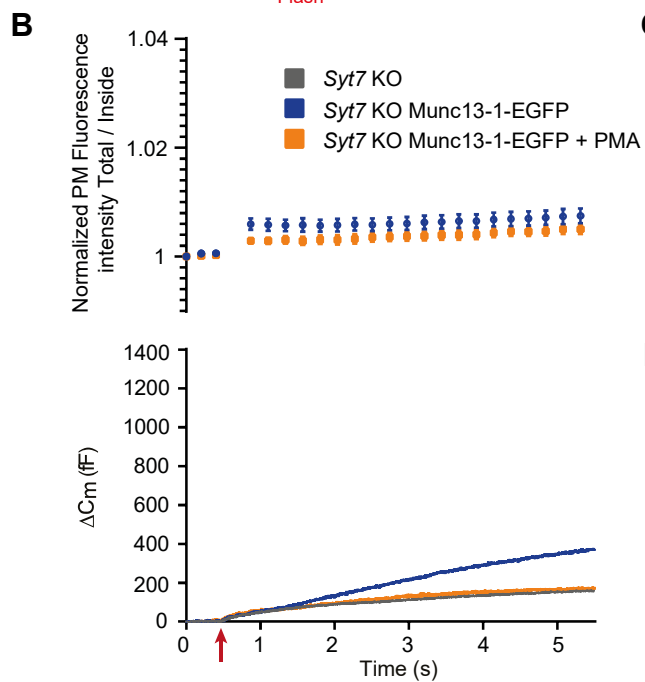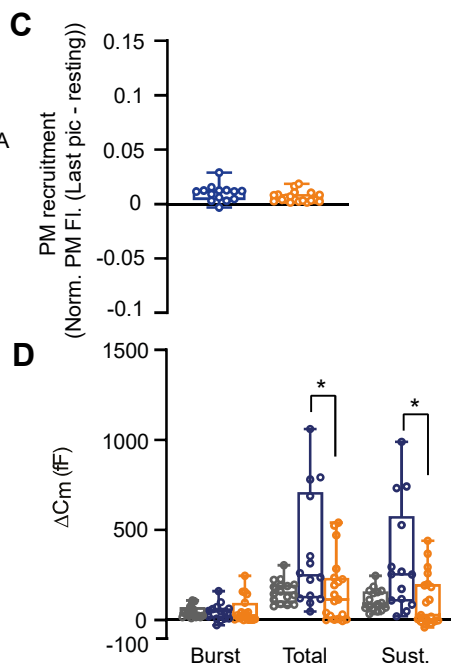

Supplement: supp [file elife_poa_e79433_Figure_7_figure_supplement_1.pdf › elife_poa_e79433_Figure_7_figure_supplement_1.pdf]

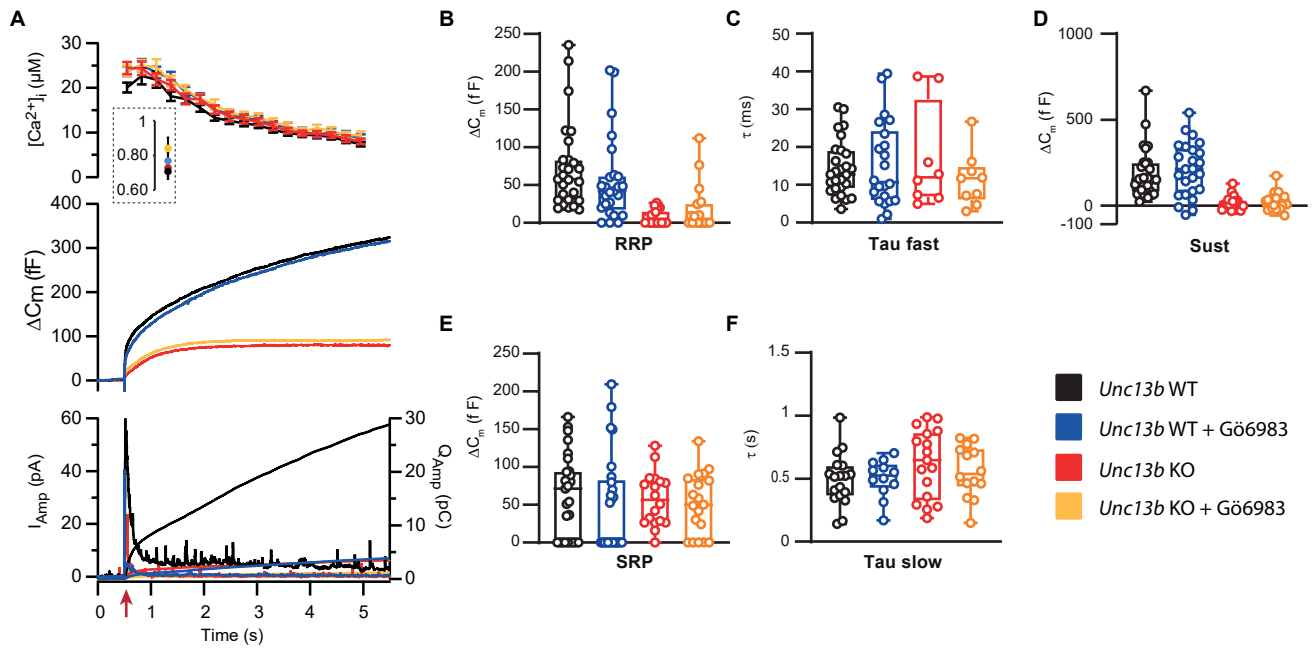

Supplement: supp [file elife_poa_e79433_Figure_7_figure_supplement_2.pdf › elife_poa_e79433_Figure_7_figure_supplement_2.pdf]
